# Supplementary material for: Accurate assembly of thiophene-bridged titanium-oxo clusters with photocatalytic amine oxidation activity
Source: Royal Society of Chemistry journal article supplement (doi:10.1039/d4ra00117f), 2024-01-01
Supplement: d4ra00117f1.pdf [file d4ra00117f1.pdf]

# Electronic Supporting Information

## Accurate assembly of thiophene-bridged titanium-oxo clusters with photocatalytic amine oxidation activity

Haoran Nai,<sup>‡a</sup> Jinle Hou,<sup>\*‡a</sup> Jinyu Li,<sup>a</sup> Xiaoxi Ma,<sup>a</sup> Yujia Yang,<sup>a</sup> Konggang Qu,<sup>a</sup> Xianqiang Huang<sup>\*a</sup> and Lianzhi Li<sup>\*a</sup>

<sup>a</sup> Shandong Provincial Key Laboratory of Chemical Energy Storage and Novel Cell Technology, and School of Chemistry and Chemical Engineering, Liaocheng University, Liaocheng, 252000, People's Republic of China. E-mail: [hujinle@lcu.edu.cn](mailto:hujinle@lcu.edu.cn) (J. L. Hou); [hxq@lcu.edu.cn](mailto:hxq@lcu.edu.cn) (X. Q. Huang); [lilianzhi1963@163.com](mailto:lilianzhi1963@163.com) (L. Z. Li).

<sup>‡</sup> These authors contributed equally to this work.

## Experimental Procedures

### Materials and Instruments

All solvents and reagents were commercially available, analytical grade and used without further purification. 2, 5-thiophenedicarboxylic acid (Thdc), dimethylglyoxime (Dmg) were purchased from Macklin.  $\text{Ti}(\text{iPrO})_4$  was purchased from Adamas and isopropanol was purchased from Sinopharm. Benzylamine (BA) and its extended substrates were purchased from Adamas.

Powder X-ray diffraction (PXRD) data were carried out on a microcrystalline powdered sample using a Rigaku SmartLab-9Kw diffractometer using Cu radiation ( $\lambda = 1.54184 \text{ \AA}$ ). Thermogravimetry (TG) analysis was performed on a STA449F5/QMS403D instrument (Mettler-Toledo, Schwerzenbach, Switzerland) with a heating rate of  $10 \text{ }^\circ\text{C min}^{-1}$  from 20 to  $800 \text{ }^\circ\text{C}$  in  $\text{N}_2$  flow. The solid-state UV/Vis spectra data of the cluster samples were obtained using a Carry 500 UV-VIS spectrophotometer with scanning wavelength range from 200 nm to 800 nm. Fourier transform infrared spectroscopy (FTIR) measurements were obtained using a Nicolet iS50 spectrophotometer. The X-ray photoelectron spectroscopy (XPS) spectra were collected on a Thermo Scientific ESCALAB Xi<sup>+</sup> instrument. The energy dispersive X-ray (EDX) spectra and element mapping of samples were acquired on a Thermo Fisher Scientific FIB-SEM-GX4 scanning electron microscope. The high-resolution electrospray ionization mass spectrometry (ESI-MS) of **Ti10** were acquired on an ACQUITY UPLC I-Class/Xevo G2-XS QTOF (Waters, Milford, USA) mass spectrometer. The data analysis of the mass spectrum was performed based on the isotope distribution patterns using MassLynx Analysis software (Version 4.1). Electrochemical measurements were carried out on a CHI 660E electrochemical workstation. Gas chromatographic (GC) analysis was carried out on a Shimadzu GC-2014C instrument equipped with a flame ionization detector (FID). Gas chromatogram and mass spectrum authentication were performed on an Agilent 7000D

## Synthesis

### Synthesis of $\text{Ti}_{10}\text{O}_6(\text{Thdc})(\text{Dmg})_2(\text{iPrO})_{22}$ (**Ti10**)

$\text{Ti}(\text{iPrO})_4$  (0.92 mL, 3 mmol), 2,5-thiophenedicarboxylic acid (Thdc) (100 mg, 0.58 mmol), and dimethylglyoxime (Dmg) (69 mg, 0.59 mmol) in isopropanol (5 mL) were ultrasonically dissolved. The mixture was sealed in 20 mL glass vial and then heated at 100 °C for 72 h. After the mixture was cooled to room temperature for a week, yellow crystals were obtained by filtration and were fully washed several times with isopropanol. Yield: 50 mg. Elemental analysis calc. (found) for **Ti10** ( $\text{C}_{80}\text{H}_{168}\text{N}_4\text{O}_{36}\text{S}_1\text{Ti}_{10}$ ): C, 42.27 (42.76); N, 2.46 (2.28); H, 7.45 (7.68)%.

The synthesis of **PTC-211** has been reported in the literature.<sup>1</sup>

### Single-crystal X-ray diffraction

X-ray diffraction measurements for the **Ti10** were performed on a Rigaku XtaLAB Synergy diffractometer operating with Cu-K $\alpha$  ( $\lambda = 1.54184 \text{ \AA}$ ) at 213K. These structures were solved by the inherent phase method in the SHELXT program and refined by full-matrix least squares techniques against  $F^2$  using the SHELXL program through the OLEX2 interface. Appropriate restraints or constraints were applied to the geometry and the atomic displacement parameters of the atoms in the cluster. The structure was examined using the Addsym subroutine of PLATON to ensure that no additional symmetry could be applied to the models. Pertinent crystallographic data collection and refinement parameters are collated in Table S6. Selected bond lengths and are collated in Table S7 and S8. The crystallographic data for **Ti10** was delivered to the Cambridge Crystallographic Data Centre (CCDC) with No. 2322179. These data can be obtained from the CCDC via [www.ccdc.cam.ac.uk/data\\_request/cif](http://www.ccdc.cam.ac.uk/data_request/cif).

## **Electrochemical measurements**

### **Photoelectrochemical measurements**

Photoelectrochemical measurements were carried out on CHI660E electrochemical workstation in a standard three-electrode electrochemical cell with a working electrode, a platinum plate as counter electrode and a saturated Ag/AgCl electrode as reference electrode. A sodium sulfate solution (0.2 M) was used as the electrolyte and use a 150W Xe lamp as the light source.

Preparation of the working electrode: 5 mg crystals powder was mixed with 0.99 mL ethanol and 10  $\mu$ L Nafion D-520 dispersion solutions and sonicated for 30 minutes. Subsequently, 200  $\mu$ L of slurry was transferred and coated on ITO glass plates (1 cm $\times$ 2 cm) then dried at room temperature.

### **Mott-Schottky plot measurements**

The Mott-Schottky plots were carried out on the electrochemical workstation via a conventional three-electrode system with a working electrode, a platinum plate as counter electrode and a saturated Ag/AgCl electrode as reference electrode in a 0.2 M Na<sub>2</sub>SO<sub>4</sub> aqueous solution at different frequencies of 1000 Hz, 1500 Hz and 2000 Hz. The working electrode was prepared same as photoelectrochemical measurements.

### **Electrochemical impedance spectroscopy**

Electrochemical impedance spectra (EIS) measurements were also carried out on CHI660E electrochemical workstation via a conventional three-electrode system with a working electrode, a platinum plate as counter electrode and a saturated Ag/AgCl electrode as reference electrode in a 0.2 M Na<sub>2</sub>SO<sub>4</sub> aqueous solution over a frequency range of 100 kHz-0.01 Hz.

## Photocatalytic oxidative coupling of benzylamines

Typically, 22 mg of photocatalyst was dispersed in 4 mL of CH<sub>3</sub>CN containing 0.2 mmol of BA in a 10 mL quartz reactor. Subsequently, the mixture was bubbled with O<sub>2</sub> for 5 minutes and irradiated with 410 nm LED (Xi'an Watecs Experimental Equipment Co., LTD., China). Simultaneously, it was stirred at 500 rpm at room temperature under a molecular oxygen atmosphere (1 atm., balloon) in a Watecs Parallel Photocatalytic Reactor (WP-TEC-1020HSL) for an appropriate reaction time (monitored by GC). After reaction completion as checked by GC/MS, the catalyst was separated by centrifugation and washed with CH<sub>3</sub>CN. Other benzylamine derivatives with the same concentration were conducted using a similar approach. The conversion of BA and selectivity for N-benzylidenebenzylamine (BDA) product, were calculated with the following Equation (1) and (2):

$$\text{Conversion (\%)} = \frac{C_0 - C_{BA}}{C_{BA}} \times 100\%$$

$$\text{Selectivity (\%)} = \frac{2 \times C_{BDA}}{C_0 - C_{BA}} \times 100\%$$

where C<sub>0</sub> is the initial concentration of BA; C<sub>BA</sub> and C<sub>BDA</sub> stand for the concentration of the residual BA and the corresponding product of BDA at a certain time after the catalytic reaction, respectively.

**Figure S1.** The image of **Ti10** under optical microscope.

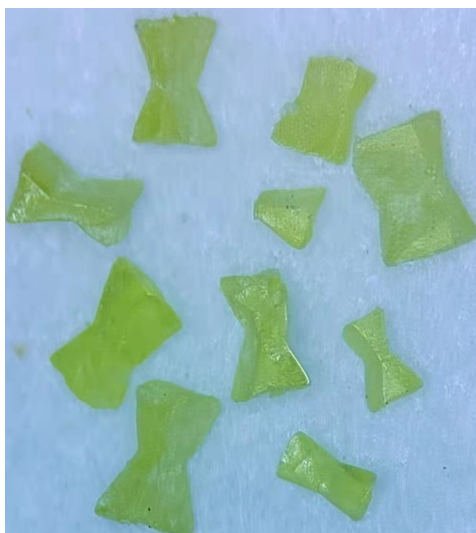

**Figure S2.** (a) Ball-and-stick view of the crystal structure of **Ti10**. (b) Ball-and-stick view of the crystal structure of **PTC-211**.

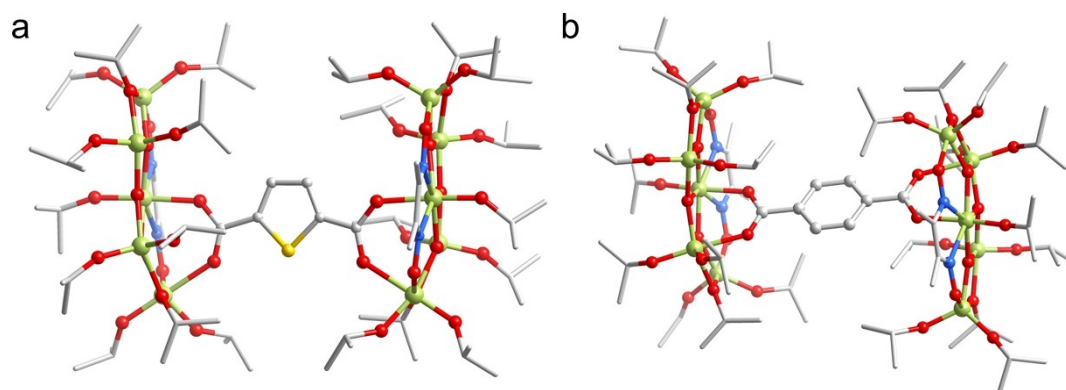



**Figure S3.** The compared PXRD patterns of **Ti10**.

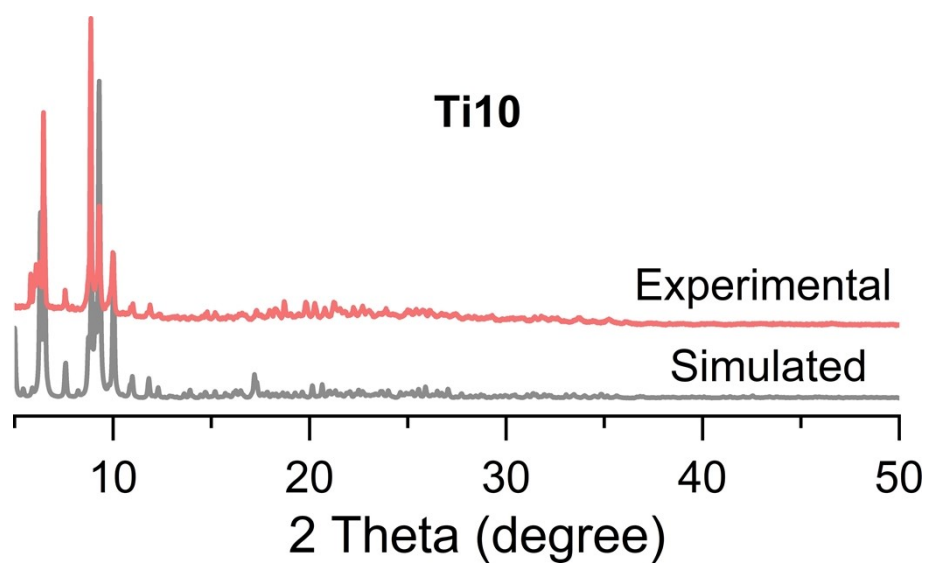

**Figure S4.** Thermogravimetry analysis (TGA) curve of **Ti10**.

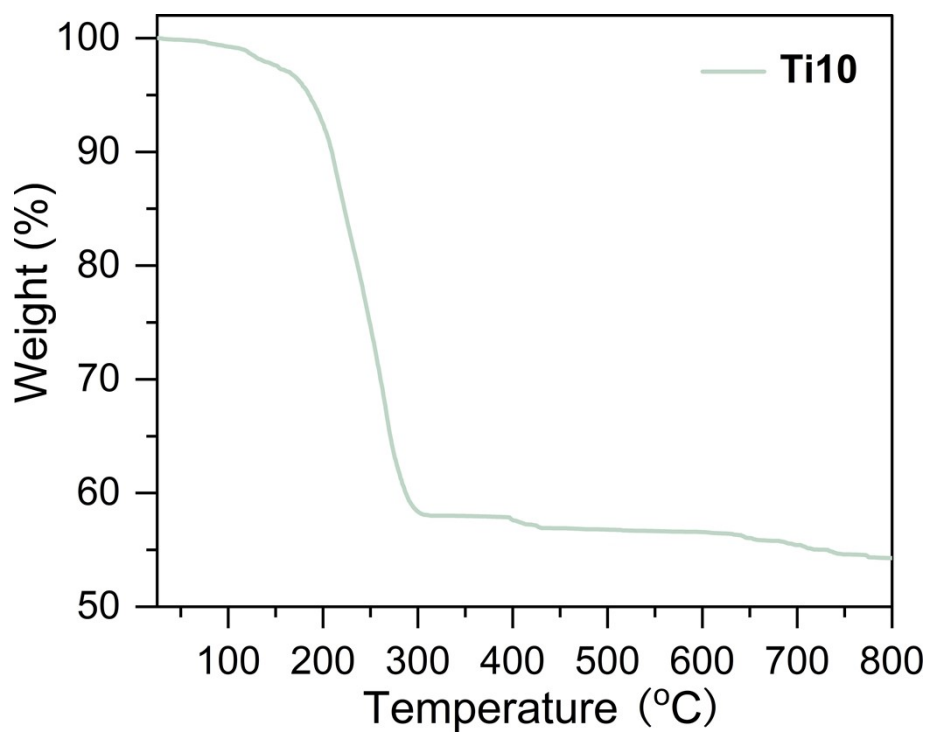

**Figure S5.** The Fourier transform infrared spectroscopy (FT-IR) of **Ti10**, Thdc and Dmg.

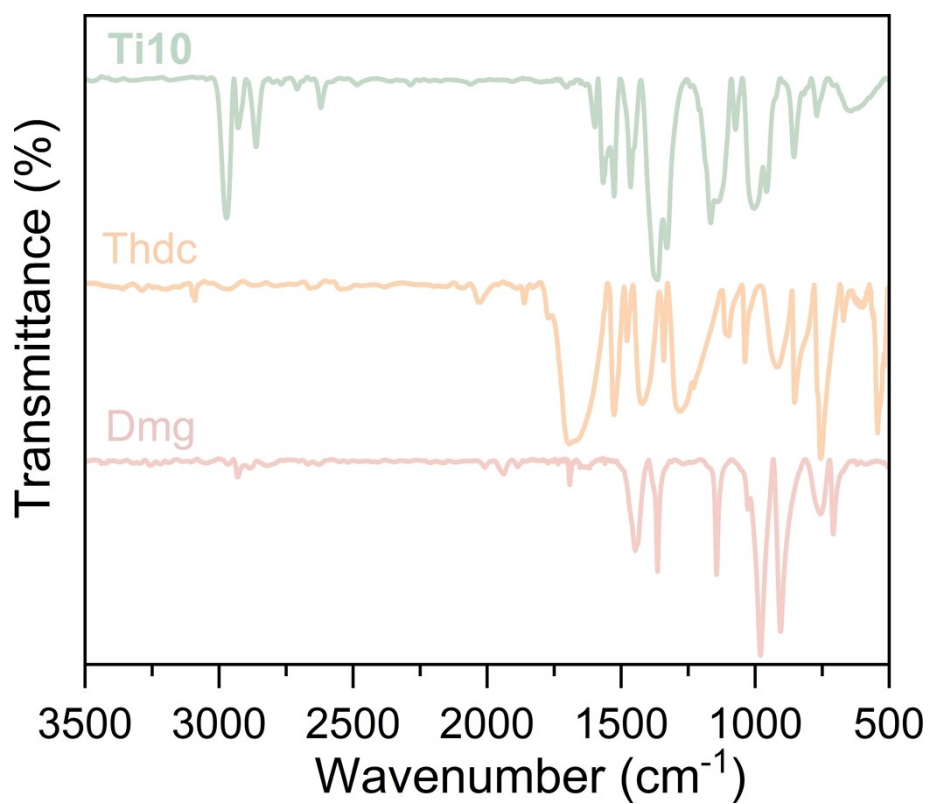

**Figure S6.** SEM and energy-dispersive X-ray spectroscopy of **Ti10**.

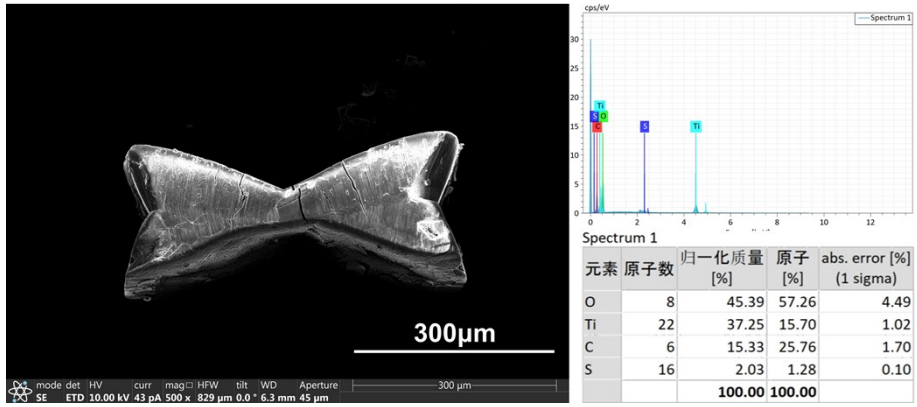

**Figure S7.** Elemental mapping images of Ti, O and S of selected area for **Ti10**.

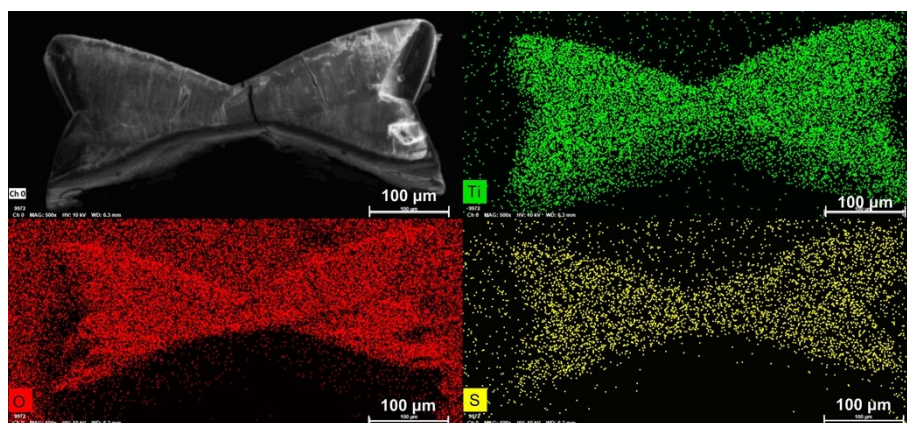

**Figure S8.** X-ray photoelectron spectroscopy (XPS) spectra of **Ti10**. XPS reveals that all Ti atoms in **Ti10** are exclusively in +4 oxidation state.

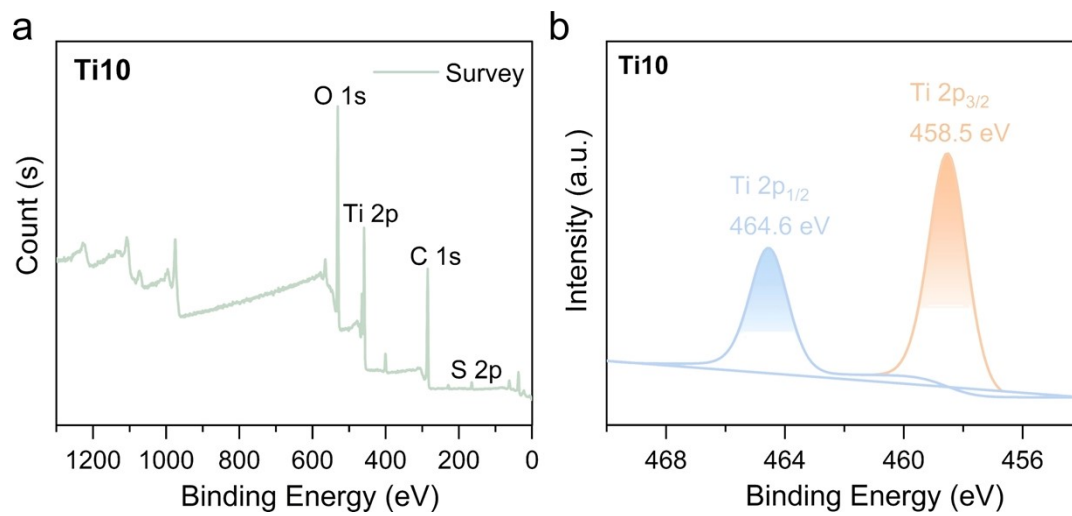

**Figure S9.** The IR spectra of **Ti10** before and after photocatalytic reaction, respectively.

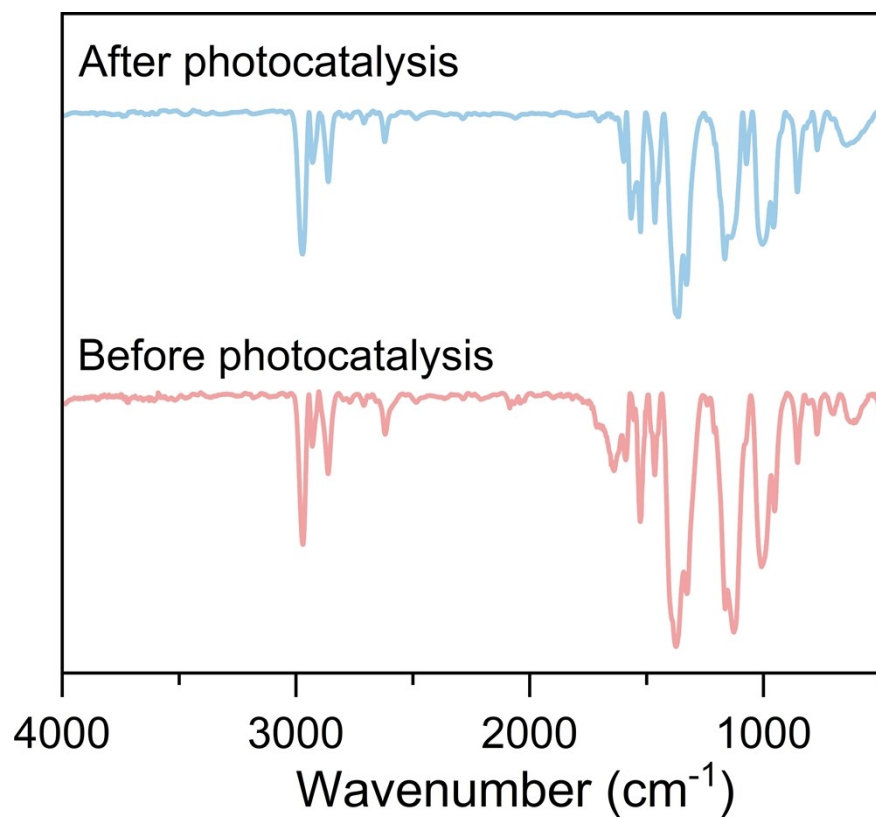

**Table S1.** Bond valence sum (BVS) analysis<sup>[a]</sup> for **Ti10**.

| <b>Ti10</b>      |         |       |                   |         |       |                  |         |       |
|------------------|---------|-------|-------------------|---------|-------|------------------|---------|-------|
| <b>Ti1 3.982</b> |         |       | <b>Ti2 4.039</b>  |         |       | <b>Ti3 3.921</b> |         |       |
| Ti1–O3           | d=2.227 | 0.308 | Ti2–O21           | d=2.016 | 0.544 | Ti3–O4           | d=2.081 | 0.457 |
| Ti1–O21          | d=2.019 | 0.540 | Ti2–O24           | d=1.780 | 1.030 | Ti3–O27          | d=1.791 | 1.000 |
| Ti1–O22          | d=1.803 | 0.968 | Ti2–O25           | d=1.762 | 1.082 | Ti3–O34          | d=1.991 | 0.582 |
| Ti1–O23          | d=1.809 | 0.953 | Ti2–O35           | d=1.926 | 0.694 | Ti3–O35          | d=2.120 | 0.411 |
| Ti1–O33          | d=1.986 | 0.590 | Ti2–O36           | d=1.929 | 0.689 | Ti3–O36          | d=1.930 | 0.687 |
| Ti1–O36          | d=1.966 | 0.623 |                   |         |       | Ti3–N3           | d=2.252 | 0.393 |
|                  |         |       |                   |         |       | Ti3–N4           | d=2.253 | 0.391 |
| <b>Ti4 4.119</b> |         |       | <b>Ti5 4.034</b>  |         |       | <b>Ti6 4.001</b> |         |       |
| Ti4–O26          | d=1.781 | 1.027 | Ti5–O28           | d=2.005 | 0.561 | Ti6–O1           | d=2.219 | 0.315 |
| Ti4–O28          | d=2.035 | 0.517 | Ti5–O30           | d=1.768 | 1.064 | Ti6–O6           | d=1.989 | 0.586 |
| Ti4–O29          | d=1.753 | 1.108 | Ti5–O31           | d=1.788 | 1.008 | Ti6–O7           | d=1.968 | 0.620 |
| Ti4–O34          | d=1.922 | 0.702 | Ti5–O32           | d=1.954 | 0.644 | Ti6–O17          | d=1.797 | 0.984 |
| Ti4–O35          | d=1.890 | 0.765 | Ti5–O34           | d=1.894 | 0.757 | Ti6–O18          | d=2.014 | 0.547 |
|                  |         |       |                   |         |       | Ti6–O19          | d=1.810 | 0.950 |
| <b>Ti7 4.057</b> |         |       | <b>Ti8 3.908</b>  |         |       |                  |         |       |
| Ti7–O7           | d=1.921 | 0.704 | Ti8–O2            | d=2.078 | 0.460 |                  |         |       |
| Ti7–O9           | d=1.918 | 0.709 | Ti8–O7            | d=1.928 | 0.691 |                  |         |       |
| Ti7–O16          | d=1.761 | 1.084 | Ti8–O8            | d=1.970 | 0.616 |                  |         |       |
| Ti7–O18          | d=2.017 | 0.543 | Ti8–O9            | d=2.151 | 0.378 |                  |         |       |
| Ti7–O20          | d=1.785 | 1.016 | Ti8–O15           | d=1.797 | 0.984 |                  |         |       |
|                  |         |       | Ti8–N1            | d=2.259 | 0.385 |                  |         |       |
|                  |         |       | Ti8–N2            | d=2.251 | 0.394 |                  |         |       |
| <b>Ti9 4.023</b> |         |       | <b>Ti10 3.997</b> |         |       |                  |         |       |
| Ti9–O8           | d=1.939 | 0.670 | Ti10–O5           | d=1.956 | 0.640 |                  |         |       |
| Ti9–O9           | d=1.894 | 0.757 | Ti10–O8           | d=1.897 | 0.751 |                  |         |       |
| Ti9–O10          | d=1.783 | 1.022 | Ti10–O11          | d=1.774 | 1.047 |                  |         |       |
| Ti9–O12          | d=2.030 | 0.524 | Ti10–O12          | d=2.010 | 0.553 |                  |         |       |
| Ti9–O14          | d=1.773 | 1.050 | Ti10–O13          | d=1.789 | 1.005 |                  |         |       |

[a]  $V_i = \sum S_{ij} = \sum \exp[(r_1 - r_{ij})/B]$ , where  $r_{ij}$  is the bond length between atoms  $i$  and  $j$  (with  $r_1 = 1.791$  for  $Ti^{iv}\text{-O}$  and  $1.906$  for  $Ti^{iv}\text{-N}$ ). The constant  $B$  is referred to as the “universal parameter” and is approximately equal to  $0.37 \text{ \AA}$ .  $S_{ij}$  is the valence of a bond between atoms  $i$  and  $j$ , and  $V_i$  is the sum of all bond valences of the bonds formed by a given atom.<sup>2</sup>



**Table S2.** Screening of solvents for photocatalytic benzylamine oxidation coupling over **Ti10**.<sup>[a]</sup>

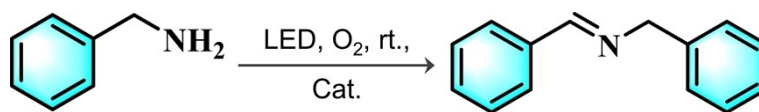

| Entry | Solvent      | Con. (%) <sup>[b]</sup> | Sel. (%) <sup>[b]</sup> |
|-------|--------------|-------------------------|-------------------------|
| 1     | Methanol     | 42                      | 97                      |
| 2     | Isopropanol  | 36                      | 98                      |
| 3     | N-hexane     | 46                      | 99                      |
| 4     | Acetonitrile | 99                      | 99                      |

[a] BA (0.2 mmol), **Ti10** (22 mg), 4 mL solvent, reaction time 18 h under an O<sub>2</sub> atmosphere at room temperature, with a 410 nm LED. [b] Determined by GC.

**Table S3.** Photocatalytic oxidation of benzylamines using LED light sources with different wavelengths.<sup>[a]</sup>

| Entry | Wavelength (nm) | Con. (%) <sup>[b]</sup> | Sel. (%) <sup>[b]</sup> |
|-------|-----------------|-------------------------|-------------------------|
| 1     | 410             | 99                      | 99                      |
| 2     | 430             | 71                      | 96                      |
| 3     | 480             | 47                      | 99                      |

[a] BA (0.2 mmol), **Ti10** (22 mg), 4 mL CH<sub>3</sub>CN, reaction time 18 h under an O<sub>2</sub> atmosphere at room temperature, using LEDs with different wavelengths. [b] Determined by GC.

**Table S4.** Optimization of the conditions for light driven oxidative coupling of benzylamines and control experiments to predict the mechanism.

| Entry             | Photocatalyst                | Con. (%) <sup>[f]</sup> | Sel. (%) <sup>[f]</sup> |
|-------------------|------------------------------|-------------------------|-------------------------|
| 1 <sup>[a]</sup>  | No catalyst                  | -                       | -                       |
| 2 <sup>[a]</sup>  | <b>Ti10</b> without light    | -                       | -                       |
| 3 <sup>[a]</sup>  | <b>Ti10</b> , N <sub>2</sub> | -                       | -                       |
| 4 <sup>[a]</sup>  | TiO <sub>2</sub>             | 42                      | 98                      |
| 5 <sup>[a]</sup>  | TiO <sub>2</sub> +Thdc+Dmg   | 51                      | 98                      |
| 6 <sup>[a]</sup>  | <b>Ti10</b>                  | 99                      | 99                      |
| 7 <sup>[a]</sup>  | <b>PTC-211</b>               | 82                      | 99                      |
| 8 <sup>[b]</sup>  | <b>Ti10</b>                  | 66                      | 96                      |
| 9 <sup>[c]</sup>  | <b>Ti10</b>                  | 56                      | 98                      |
| 10 <sup>[d]</sup> | <b>Ti10</b>                  | 91                      | 99                      |
| 11 <sup>[e]</sup> | <b>Ti10</b>                  | 45                      | 97                      |
| 12 <sup>[a]</sup> | <b>Ti10</b> , air            | 81                      | 98                      |

[a] BA (0.2 mmol), catalysts (22 mg), 4 mL CH<sub>3</sub>CN, reaction time of 18 h under an O<sub>2</sub> atmosphere at room temperature, with a 410 nm LED. [b] For the same conditions as [a], but with benzoquinone (BQ) as a superoxide radicals (<sup>•</sup>O<sub>2</sub><sup>-</sup>) scavenger. [c] Likewise, under identical conditions as [a], AgNO<sub>3</sub> was used as an electron scavenger. [d] Similarly, [a] was followed, but with 2,2,6,6-tetramethylpiperidin-1-oxyl (TEMPO) as a singlet oxygen (<sup>1</sup>O<sub>2</sub>) scavenger. [e] Following the conditions of [a], KI was used as a hole scavenger. [f] The results were determined by GC.

**Table S5.** Photocatalytic oxidative coupling reactions of various amines over the **Ti10** sample.

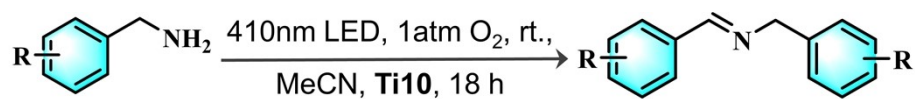

| Entry | Substrate | Product | Con. (%) | Sel. (%) |
|-------|-----------|---------|----------|----------|
| 1     |           |         | 99       | 99       |
| 2     |           |         | 97       | 99       |
| 3     |           |         | 98       | 98       |
| 4     |           |         | 97       | 99       |
| 5     |           |         | 93       | 94       |
| 6     |           |         | 99       | 99       |
| 7     |           |         | 98       | 97       |
| 8     |           |         | 94       | 99       |
| 9     |           |         | 97       | 97       |
| 10    |           |         | 96       | 99       |
| 11    |           |         | 99       | 99       |

**Table S6.** Comparison results of **Ti10** with typical reported catalysts of some Ti-related materials.

| Entry | Catalysts                        | Oxidant                       | Temperature | Time   | Light source          | Selectivity | Conversion | Ref.      |
|-------|----------------------------------|-------------------------------|-------------|--------|-----------------------|-------------|------------|-----------|
| 1     | Ti-PMOF                          | air                           | R.T.        | 30 min | 623 nm LED            | 85 %        | 93 %       | 3         |
| 2     | PCN-222                          | air                           | R.T.        | 1 h    | $\lambda \geq 420$ nm | 100 %       | 100 %      | 4         |
| 3     | ARS-TiO <sub>2</sub>             | TEMPO                         | R.T.        | 2 h    | blue LED              | 96 %        | 92 %       | 5         |
| 4     | NH <sub>2</sub> -MIL-125(Ti)     | O <sub>2</sub>                | R.T.        | 12 h   | $\lambda \geq 420$ nm | 73 %        | 86 %       | 6         |
| 5     | Polyimide-TiO <sub>2</sub>       | TEMPO                         | R.T.        | 50 min | 460 nm LED            | 91 %        | 98 %       | 7         |
| 6     | TPA                              | O <sub>2</sub>                | R.T.        | 8 h    | $\lambda \geq 420$ nm | 98 %        | 95 %       | 8         |
| 7     | Th6-C8A                          | O <sub>2</sub>                | R.T.        | 16 h   | $\lambda \geq 420$ nm | 97 %        | 99 %       | 9         |
| 8     | Ti <sub>3</sub> Fc               | TBHP                          | 70 °C       | 8 h    | $\lambda \geq 420$ nm | 99 %        | 99 %       | 10        |
| 9     | Ti <sub>11</sub> Fc <sub>2</sub> | TBHP                          | 70 °C       | 8 h    | $\lambda \geq 420$ nm | 88 %        | 99 %       | 10        |
| 10    | Ti <sub>22</sub> Fc <sub>4</sub> | TBHP                          | 70 °C       | 8 h    | $\lambda \geq 420$ nm | 85 %        | 99 %       | 10        |
| 11    | Ti <sub>13</sub> L <sub>6</sub>  | H <sub>2</sub> O <sub>2</sub> | 60°C        | 12 h   | $\lambda \geq 420$ nm | 99 %        | 99 %       | 11        |
| 12    | Ti10                             | O <sub>2</sub>                | R.T.        | 18 h   | 410 nm LED            | 99 %        | 99 %       | This work |

TEMPO = 2,2,6,6-tetramethylpiperidin-1-yl)oxyl; TBHP = tert-butyl hydroperoxide; TPA = titanium-porphyrinic aerogels.

**Table S7.** Crystal data collection and structure refinement for **Ti10**.

| Compound                                    | Ti10                                                                              |
|---------------------------------------------|-----------------------------------------------------------------------------------|
| Empirical formula                           | C <sub>80</sub> H <sub>168</sub> N <sub>4</sub> O <sub>36</sub> STi <sub>10</sub> |
| Formula weight                              | 2273.23                                                                           |
| Temperature [K]                             | 213.00(10)                                                                        |
| Crystal system                              | triclinic                                                                         |
| Space group (number)                        | <i>P</i> $\bar{1}$ (2)                                                            |
| <i>a</i> [Å]                                | 16.5980(5)                                                                        |
| <i>b</i> [Å]                                | 14.186(2)                                                                         |
| <i>c</i> [Å]                                | 20.9945(7)                                                                        |
| $\alpha$ [°]                                | 74.614(3)                                                                         |
| $\beta$ [°]                                 | 75.671(3)                                                                         |
| $\gamma$ [°]                                | 74.331(3)                                                                         |
| Volume [Å <sup>3</sup> ]                    | 5863.0(4)                                                                         |
| <i>Z</i>                                    | 2                                                                                 |
| $\rho_{\text{calc}}$ [g/cm <sup>3</sup> ]   | 1.287                                                                             |
| $\mu$ [mm <sup>-1</sup> ]                   | 6.239                                                                             |
| <i>F</i> (000)                              | 2398                                                                              |
| Radiation                                   | Cu <i>K</i> <sub><math>\alpha</math></sub> ( $\lambda$ =1.54184 Å)                |
| 2 $\theta$ range [°]                        | 5.09 to 134.16 (0.84 Å)                                                           |
| Index ranges                                | -16 ≤ <i>h</i> ≤ 19<br>-22 ≤ <i>k</i> ≤ 22<br>-24 ≤ <i>l</i> ≤ 25                 |
| Reflections collected                       | 63279                                                                             |
| Independent reflections                     | 20665<br><i>R</i> <sub>int</sub> = 0.0560<br><i>R</i> <sub>sigma</sub> = 0.0551   |
| Completeness to $\theta = 66.561^\circ$     | 98.7 %                                                                            |
| Data / Restraints / Parameters              | 20665/691/1448                                                                    |
| Goodness-of-fit on <i>F</i> <sup>2</sup>    | 1.040                                                                             |
| Final <i>R</i> indexes [I ≥ 2σ( <i>I</i> )] | <i>R</i> <sub>1</sub> = 0.0448<br>w <i>R</i> <sub>2</sub> = 0.1198                |
| Final <i>R</i> indexes [all data]           | <i>R</i> <sub>1</sub> = 0.0796<br>w <i>R</i> <sub>2</sub> = 0.1774                |
| Largest peak/hole [e/Å <sup>3</sup> ]       | 0.82/-0.82                                                                        |

**Table S8.** Selected bond lengths (Å) for **Ti10**.

| <b>Ti10</b>      |                   |                  |                   |
|------------------|-------------------|------------------|-------------------|
| <b>Atom-Atom</b> | <b>Length / Å</b> | <b>Atom-Atom</b> | <b>Length / Å</b> |
| Ti1–O3           | 2.227(3)          | Ti6–O1           | 2.219(3)          |
| Ti1–O21          | 2.019(3)          | Ti6–O6           | 1.989(3)          |
| Ti1–O22          | 1.803(3)          | Ti6–O7           | 1.968(2)          |
| Ti1–O23          | 1.809(3)          | Ti6–O17          | 1.797(3)          |
| Ti1–O33          | 1.986(3)          | Ti6–O18          | 2.014(3)          |
| Ti1–O36          | 1.966(3)          | Ti6–O19          | 1.810(3)          |
| Ti2–O21          | 2.016(3)          | Ti7–O7           | 1.921(3)          |
| Ti2–O24          | 1.780(4)          | Ti7–O9           | 1.918(3)          |
| Ti2–O25          | 1.762(3)          | Ti7–O16          | 1.761(4)          |
| Ti2–O35          | 1.926(3)          | Ti7–O18          | 2.017(3)          |
| Ti2–O36          | 1.929(3)          | Ti7–O20          | 1.785(4)          |
| Ti3–O4           | 2.081(2)          | Ti8–O2           | 2.078(3)          |
| Ti3–O27          | 1.791(3)          | Ti8–O7           | 1.928(3)          |
| Ti3–O34          | 1.991(3)          | Ti8–O8           | 1.970(3)          |
| Ti3–O35          | 2.120(3)          | Ti8–O9           | 2.151(3)          |
| Ti3–O36          | 1.930(3)          | Ti8–O15          | 1.797(3)          |
| Ti3–N3           | 2.252(3)          | Ti8–N1           | 2.259(3)          |
| Ti3–N4           | 2.253(3)          | Ti8–N2           | 2.251(3)          |
| Ti4–O26          | 1.781(5)          | Ti9–O8           | 1.939(3)          |
| Ti4–O28          | 2.035(3)          | Ti9–O9           | 1.894(3)          |
| Ti4–O29          | 1.753(4)          | Ti9–O10          | 1.783(4)          |
| Ti4–O34          | 1.922(3)          | Ti9–O12          | 2.030(3)          |
| Ti4–O35          | 1.890(3)          | Ti9–O14          | 1.773(4)          |
| Ti5–O28          | 2.005(3)          | Ti10–O5          | 1.956(3)          |
| Ti5–O30          | 1.768(4)          | Ti10–O8          | 1.897(3)          |
| Ti5–O31          | 1.788(3)          | Ti10–O11         | 1.774(4)          |
| Ti5–O32          | 1.954(3)          | Ti10–O12         | 2.010(3)          |
| Ti5–O34          | 1.894(3)          | Ti10–O13         | 1.789(3)          |

**Table S9.** Selected band angles (°) of **Ti10**.

| <b>Ti10</b>           |                  |                       |                  |
|-----------------------|------------------|-----------------------|------------------|
| <b>Atom–Atom–Atom</b> | <b>Angle [°]</b> | <b>Atom–Atom–Atom</b> | <b>Angle [°]</b> |
| O21–Ti1–O3            | 82.62(11)        | O36–Ti3–N4            | 142.61(12)       |
| O22–Ti1–O3            | 82.83(12)        | N3–Ti3–N4             | 67.90(11)        |
| O22–Ti1–O21           | 105.54(13)       | O26–Ti4–O28           | 91.71(19)        |
| O22–Ti1–O23           | 97.09(14)        | O26–Ti4–O34           | 131.4(2)         |
| O22–Ti1–O36           | 163.27(12)       | O26–Ti4–O35           | 97.35(19)        |
| O23–Ti1–O3            | 179.09(13)       | O29–Ti4–O26           | 111.6(3)         |
| O23–Ti1–O21           | 96.54(13)        | O29–Ti4–O28           | 98.35(19)        |
| O23–Ti1–O33           | 95.76(13)        | O29–Ti4–O34           | 116.1(2)         |
| O23–Ti1–O36           | 99.57(12)        | O29–Ti4–O35           | 105.85(18)       |
| O33–Ti1–O3            | 85.16(11)        | O34–Ti4–O28           | 72.88(12)        |
| O33–Ti1–O21           | 154.89(12)       | O35–Ti4–O28           | 148.75(13)       |
| O36–Ti1–O3            | 80.54(10)        | O35–Ti4–O34           | 78.79(12)        |
| O36–Ti1–O21           | 74.17(11)        | O30–Ti5–O28           | 99.93(19)        |
| O36–Ti1–O33           | 82.25(11)        | O30–Ti5–O31           | 107.39(19)       |
| O24–Ti2–O21           | 91.64(16)        | O30–Ti5–O32           | 100.35(18)       |
| O24–Ti2–O35           | 96.64(15)        | O30–Ti5–O34           | 120.66(17)       |
| O24–Ti2–O36           | 139.05(19)       | O31–Ti5–O28           | 97.53(16)        |
| O25–Ti2–O21           | 102.41(15)       | O31–Ti5–O32           | 92.62(15)        |
| O25–Ti2–O24           | 108.4(2)         | O31–Ti5–O34           | 131.93(15)       |
| O25–Ti2–O35           | 105.23(16)       | O32–Ti5–O28           | 153.42(13)       |
| O25–Ti2–O36           | 112.23(18)       | O34–Ti5–O28           | 74.13(12)        |
| O35–Ti2–O21           | 146.85(12)       | O34–Ti5–O32           | 80.80(11)        |
| O35–Ti2–O36           | 77.83(11)        | O6–Ti6–O1             | 85.12(11)        |
| O36–Ti2–O21           | 75.00(11)        | O6–Ti6–O18            | 154.81(11)       |
| O27–Ti3–O4            | 172.72(13)       | O7–Ti6–O6             | 81.93(10)        |
| O27–Ti3–O34           | 97.26(13)        | O7–Ti6–O18            | 74.18(11)        |
| O27–Ti3–O35           | 97.85(12)        | O17–Ti6–O1            | 178.86(14)       |
| O27–Ti3–O36           | 92.42(12)        | O17–Ti6–O6            | 95.96(14)        |
| O27–Ti3–N3            | 92.35(13)        | O17–Ti6–O7            | 99.53(12)        |
| O27–Ti3–N4            | 86.74(13)        | O17–Ti6–O18           | 95.77(14)        |
| O35–Ti3–N3            | 146.80(11)       | O17–Ti6–O19           | 97.12(13)        |
| O35–Ti3–N4            | 143.87(12)       | O18–Ti6–O1            | 83.37(12)        |
| O36–Ti3–O4            | 87.58(10)        | O19–Ti6–O1            | 82.41(11)        |
| O36–Ti3–O34           | 144.92(12)       | O19–Ti6–O6            | 95.04(12)        |
| O36–Ti3–O35           | 73.28(11)        | O19–Ti6–O7            | 163.30(12)       |
| O36–Ti3–N3            | 74.79(11)        | O19–Ti6–O18           | 105.52(13)       |



Continue above

| <b>Ti10</b>           |                  |                       |                  |
|-----------------------|------------------|-----------------------|------------------|
| <b>Atom-Atom-Atom</b> | <b>Angle [°]</b> | <b>Atom-Atom-Atom</b> | <b>Angle [°]</b> |
| O7-Ti7-O18            | 75.11(11)        | O15-Ti8-O9            | 98.07(12)        |
| O9-Ti7-O7             | 78.60(11)        | O15-Ti8-N1            | 91.90(12)        |
| O9-Ti7-O18            | 146.55(12)       | O15-Ti8-N2            | 86.97(12)        |
| O16-Ti7-O7            | 110.89(18)       | N2-Ti8-N1             | 67.88(11)        |
| O16-Ti7-O9            | 105.29(16)       | O8-Ti9-O12            | 72.61(12)        |
| O16-Ti7-O18           | 103.18(16)       | O9-Ti9-O8             | 78.06(11)        |
| O16-Ti7-O20           | 110.2(2)         | O9-Ti9-O12            | 147.19(13)       |
| O20-Ti7-O7            | 138.52(19)       | O10-Ti9-O8            | 114.69(17)       |
| O20-Ti7-O9            | 95.96(16)        | O10-Ti9-O9            | 106.89(16)       |
| O20-Ti7-O18           | 90.33(17)        | O10-Ti9-O12           | 98.59(17)        |
| O2-Ti8-O9             | 88.74(11)        | O14-Ti9-O8            | 135.95(19)       |
| O2-Ti8-N1             | 80.74(11)        | O14-Ti9-O9            | 98.35(16)        |
| O2-Ti8-N2             | 89.24(11)        | O14-Ti9-O10           | 108.4(2)         |
| O7-Ti8-O2             | 87.36(10)        | O14-Ti9-O12           | 92.71(16)        |
| O7-Ti8-O8             | 144.12(11)       | O5-Ti10-O12           | 152.19(13)       |
| O7-Ti8-O9             | 72.93(11)        | O8-Ti10-O5            | 81.35(11)        |
| O7-Ti8-N1             | 74.87(11)        | O8-Ti10-O12           | 73.92(12)        |
| O7-Ti8-N2             | 142.65(11)       | O11-Ti10-O5           | 100.16(16)       |
| O8-Ti8-O2             | 86.76(11)        | O11-Ti10-O8           | 116.84(17)       |
| O8-Ti8-O9             | 71.58(11)        | O11-Ti10-O12          | 102.22(17)       |
| O8-Ti8-N1             | 138.53(12)       | O11-Ti10-O13          | 107.1(2)         |
| O8-Ti8-N2             | 72.60(11)        | O13-Ti10-O5           | 91.43(15)        |
| O9-Ti8-N1             | 146.49(11)       | O13-Ti10-O8           | 136.06(17)       |
| O9-Ti8-N2             | 144.18(11)       | O13-Ti10-O12          | 97.52(16)        |
| O15-Ti8-O2            | 172.56(12)       | C3-S1-C4              | 91.35(18)        |
| O15-Ti8-O7            | 91.77(12)        | O1-C5-O2              | 126.9(3)         |
| O15-Ti8-O8            | 98.20(12)        | O3-C6-O4              | 126.6(3)         |

**Figure S10.** Gas chromatogram and mass spectrum authentication of N-benzylideneaniline obtained from the GC-MS analysis after 18 h reaction over the **Ti10** sample.

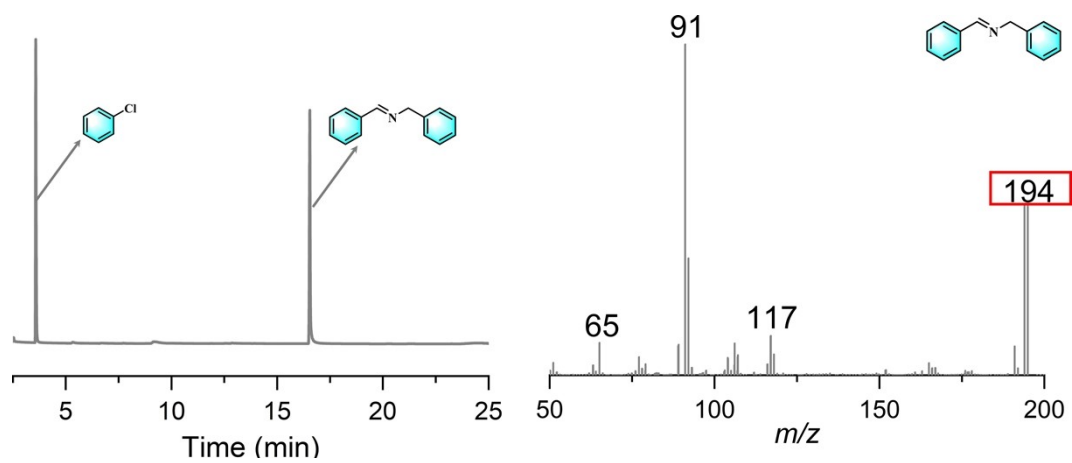

**Figure S11.** Gas chromatogram and mass spectrum authentication of N-(4-fluorobenzyl)-1-(4-fluorophenyl) methanimine obtained from the GC-MS analysis after 18 h reaction over the **Ti10** sample.

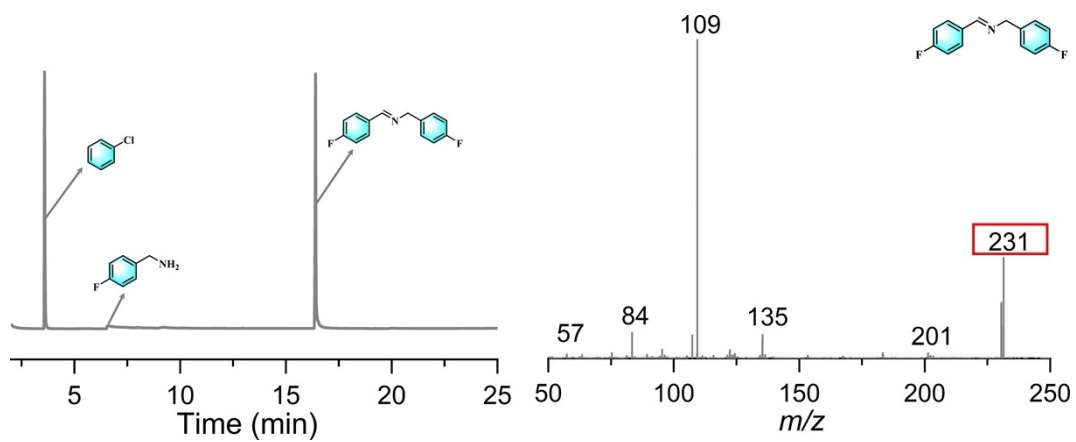

**Figure S12.** Gas chromatogram and mass spectrum authentication of N-(4-chlorobenzyl)-1-(4-chlorophenyl) methanimine obtained from the GC-MS analysis after 18 h reaction over the **Ti10** sample.

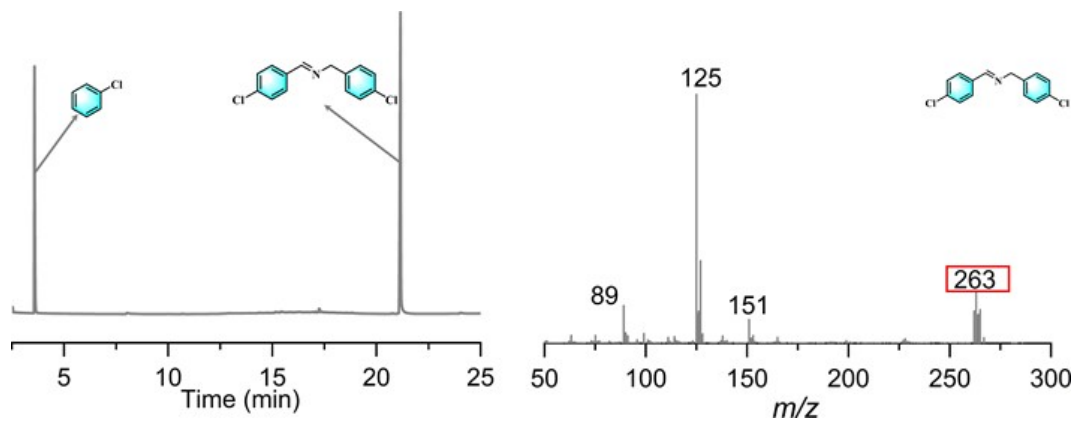

**Figure S13.** Gas chromatogram and mass spectrum authentication of N-(4-bromobenzyl)-1-(4-bromophenyl) methanimine obtained from the GC-MS analysis after 18 h reaction over the **Ti10** sample.

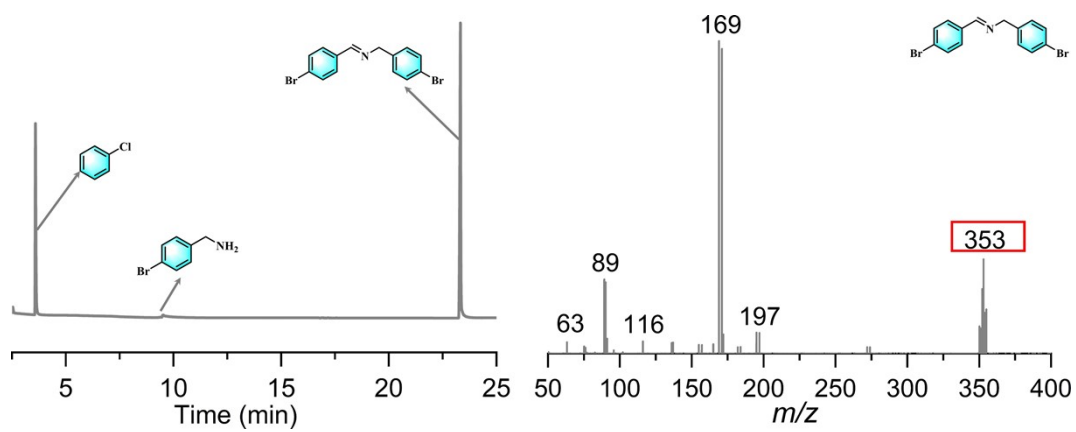

**Figure S14.** Gas chromatogram and mass spectrum authentication of N-(4-methylbenzyl)-1-(p-tolyl) methanimine obtained from the GC-MS analysis after 18 h reaction over the **Ti10** sample.

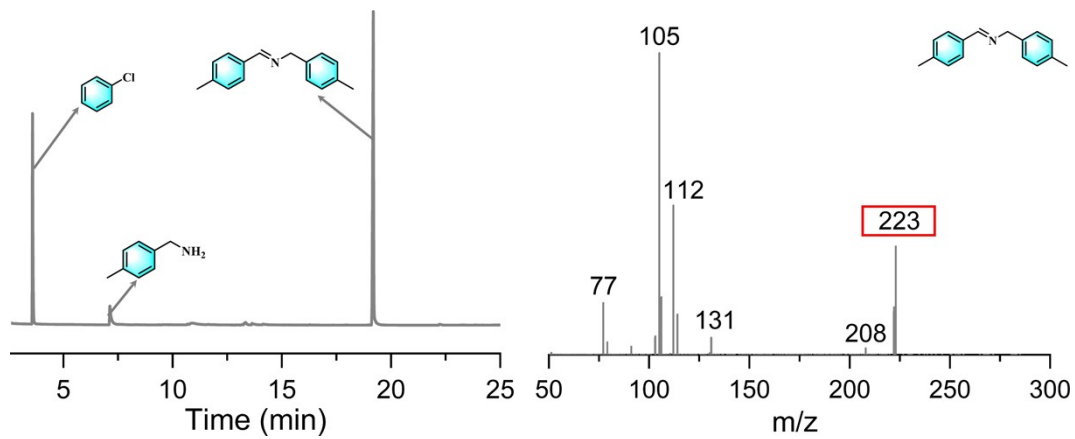

**Figure S15.** Gas chromatogram and mass spectrum authentication of N-(4-methoxybenzyl)-1-(4-methoxyphenyl) methanimine obtained from the GC-MS analysis after 18 h reaction over the **Ti10** sample.

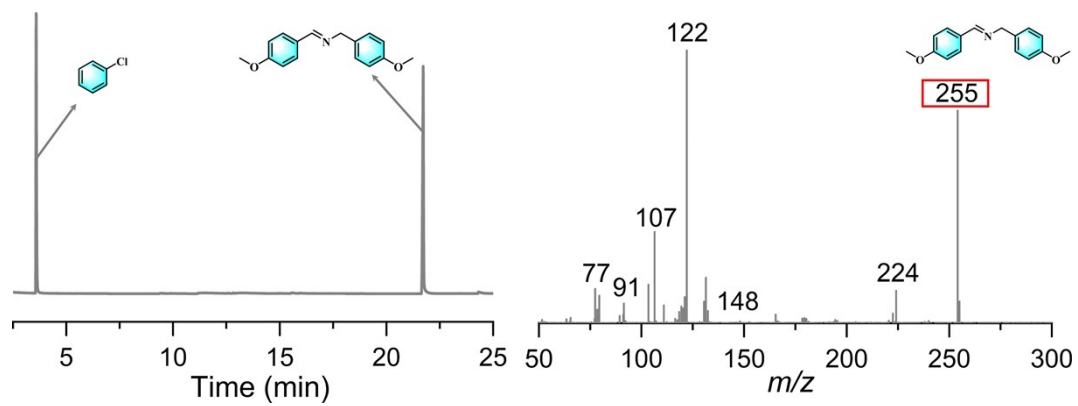

**Figure S16.** Gas chromatogram and mass spectrum authentication of N-(2-methoxybenzyl)-1-(2-methoxyphenyl) methanimine obtained from the GC-MS analysis after 18 h reaction over the **Ti10** sample.

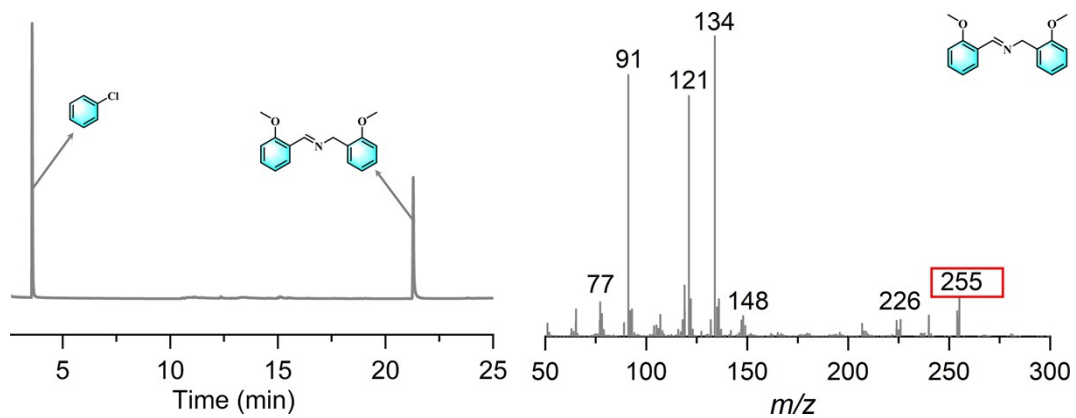



**Figure S17.** Gas chromatogram and mass spectrum authentication of N-(3-methoxybenzyl)-1-(3-methoxyphenyl) methanimine obtained from the GC-MS analysis after 18 h reaction over the **Ti10** sample.

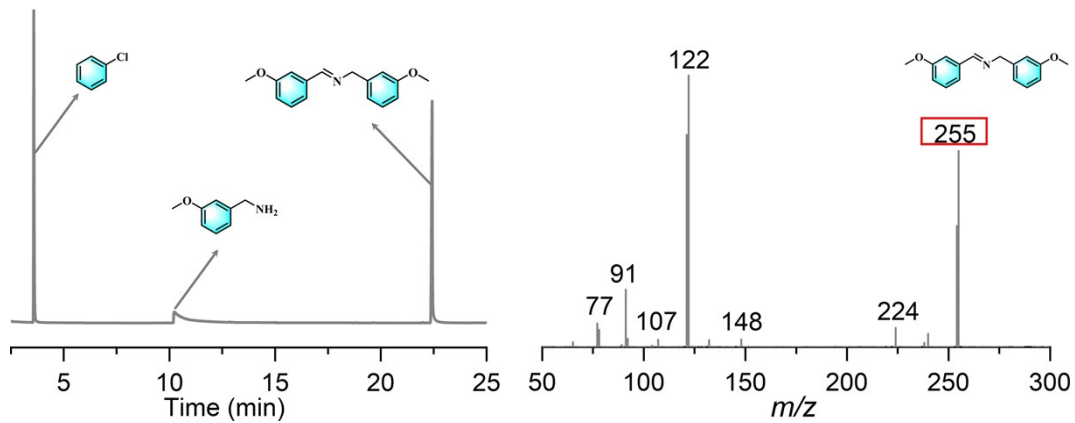

**Figure S18.** Gas chromatogram and mass spectrum authentication of N-(4-(tert-butyl)benzyl)-1-(4-(tert-butyl)phenyl) methanimine obtained from the GC-MS analysis after 18 h reaction over the **Ti10** sample.

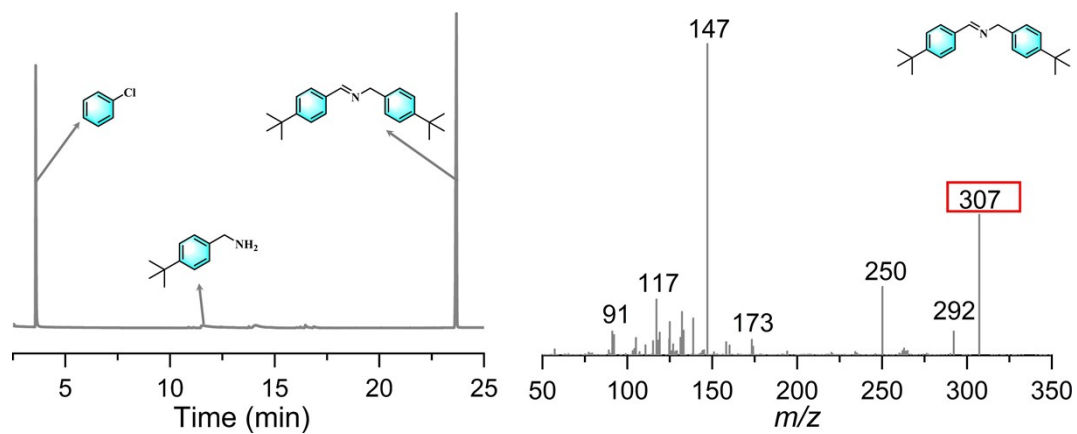

**Figure S19.** Gas chromatogram and mass spectrum authentication of N-(4-(trifluoromethyl) benzyl)-1-(4-(trifluoromethyl) phenyl) methanimine obtained from the GC-MS analysis after 18 h reaction over the **Ti10** sample.

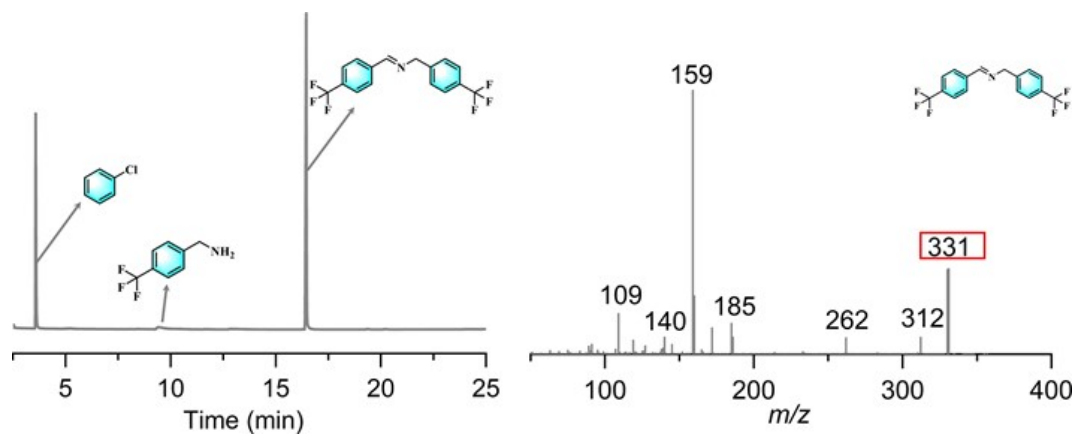

**Figure S20.** Gas chromatogram and mass spectrum authentication of (1-(thiophen-2-yl)-N-(thiophen-2-ylmethyl) methanimine obtained from the GC-MS analysis after 18h reaction over the **Ti10** sample.

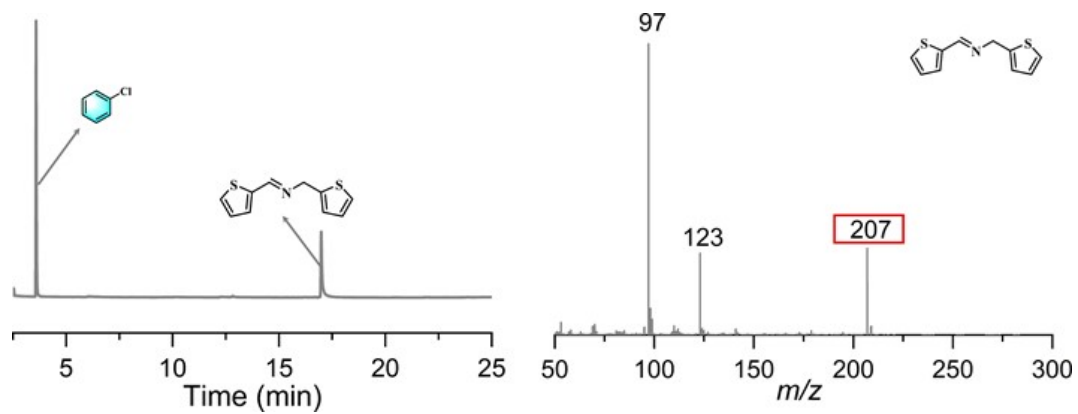

## Reference

- 1 Q.-R. Ding, G.-L. Xu, L. Zhang, J. Zhang and Q.-R. Ding, Ligand-directed assembly engineering of trapezoidal  $\{Ti_5\}$  building blocks stabilized by dimethylglyoxime, *Dalton Trans.*, 2019, **48**, 9916-9919.
- 2 I. D. Brown, Recent Developments in the Methods and Applications of the Bond Valence Model, *Chem. Rev.*, 2009, **109**, 6858-6919.
- 3 W.-L. Sheng, F.-W. Huang, X.-Y. Dong, and X.-J. Lang, Solvent-controlled synthesis of Ti-based porphyrinic metal–organic frameworks for the selective photocatalytic oxidation of amines, *J. Colloid Interf. Sci.*, 2022, **628**, 784-793.
- 4 C.-Y. Xu, H. Liu, D.-D. Li, J.-H. Su and H.-L. Jiang, Direct evidence of charge separation in a metal–organic framework: efficient and selective photocatalytic oxidative coupling of amines via charge and energy transfer, *Chem. Sci.*, 2018, **9**, 3152-3158.
- 5 Z. Wang, X.-J. Lang, Visible light photocatalysis of dye-sensitized  $TiO_2$ : The selective aerobic oxidation of amines to imines, *Appl. Catalysis B: Environ.*, 2018, **224**, 404-409.
- 6 D.-R. Sun, L. Ye and Z.-H. Li, Visible-light-assisted aerobic photocatalytic oxidation of amines to imines over  $NH_2$ -MIL-125(Ti), *Appl. Catal., B*, 2015, **164**, 428-432.
- 7 W.-L. Sheng, J.-L. Shi, H.-M. Hao, X. Li and X.-J. Lang, Polyimide- $TiO_2$  hybrid photocatalysis: Visible light-promoted selective aerobic oxidation of amines, *Chem. Eng. J.*, 2020, **379**, 122399.
- 8 Y. Keum, B. Kim, A. Byun and J. Park, Synthesis and Photocatalytic Properties of Titanium-Porphyrinic Aerogels, *Angew. Chem., Int. Ed.*, 2020, **59**, 21591-21596.
- 9 Q. Niu, Q. Huang, T.-Y. Yu, J. Liu, J.-W. Shi, L.-Z. Dong, S.-L. Li, and Y.-Q. Lan. Achieving High Photo/Thermocatalytic Product Selectivity and Conversion via Thorium Clusters with Switchable Functional Ligands, *J. Am. Chem. Soc.*, 2022, **144**, 18586–18594.
- 10 E.-M. Han, W.-D. Yu, L.-J. Li, X.-Y. Yi, J. Yan and C. Chao, Accurate assembly of ferrocene-functionalized  $\{Ti_{22}Fc_4\}$  clusters with photocatalytic amine oxidation activity, *Chem. Commun.*, 2021, **57**, 2792-2795.
- 11 Y.-Q. Tian, Y.-S. Cui, W.-D. Yu, C.-Q. Xu, X.-Y. Yi, J. Yan, J. Li and C. Liu, An

ultrastable Ti-based metallocalixarene nanocage cluster with photocatalytic amine oxidation activity, *Chem. Commun.*, 2022, **58**, 6028–6031.
